# Supplementary material
Source: PubMed Central journal article supplement (PMC6517663)
Supplement: ba030452-suppl1.pdf [file ba030452-suppl1.pdf]

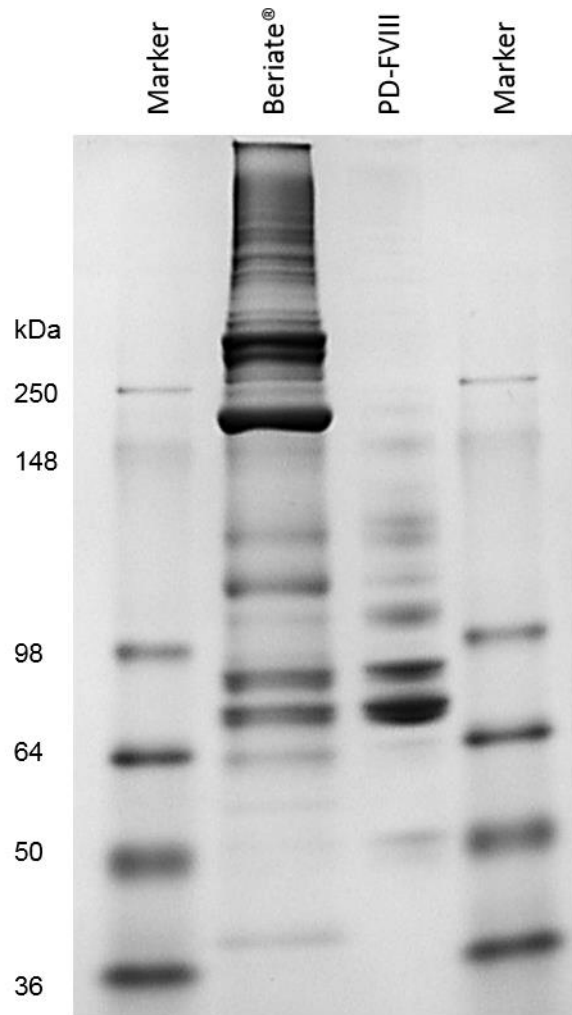

**Supplementary Figure 1:** SDS-PAGE of Beriate<sup>®</sup>, a pdFVIII concentrate containing VWF, and VIIISelect<sup>™</sup> affinity step eluate (GE Healthcare, Uppsala, Sweden), designated as PD-FVIII (without VWF). Tris-Glycine PAGE, 8-16% (Novex); load 12 IU FVIII, chromogenic activity (Coamatic<sup>®</sup>); GelCode<sup>™</sup> Blue Stain (Thermo Scientific).

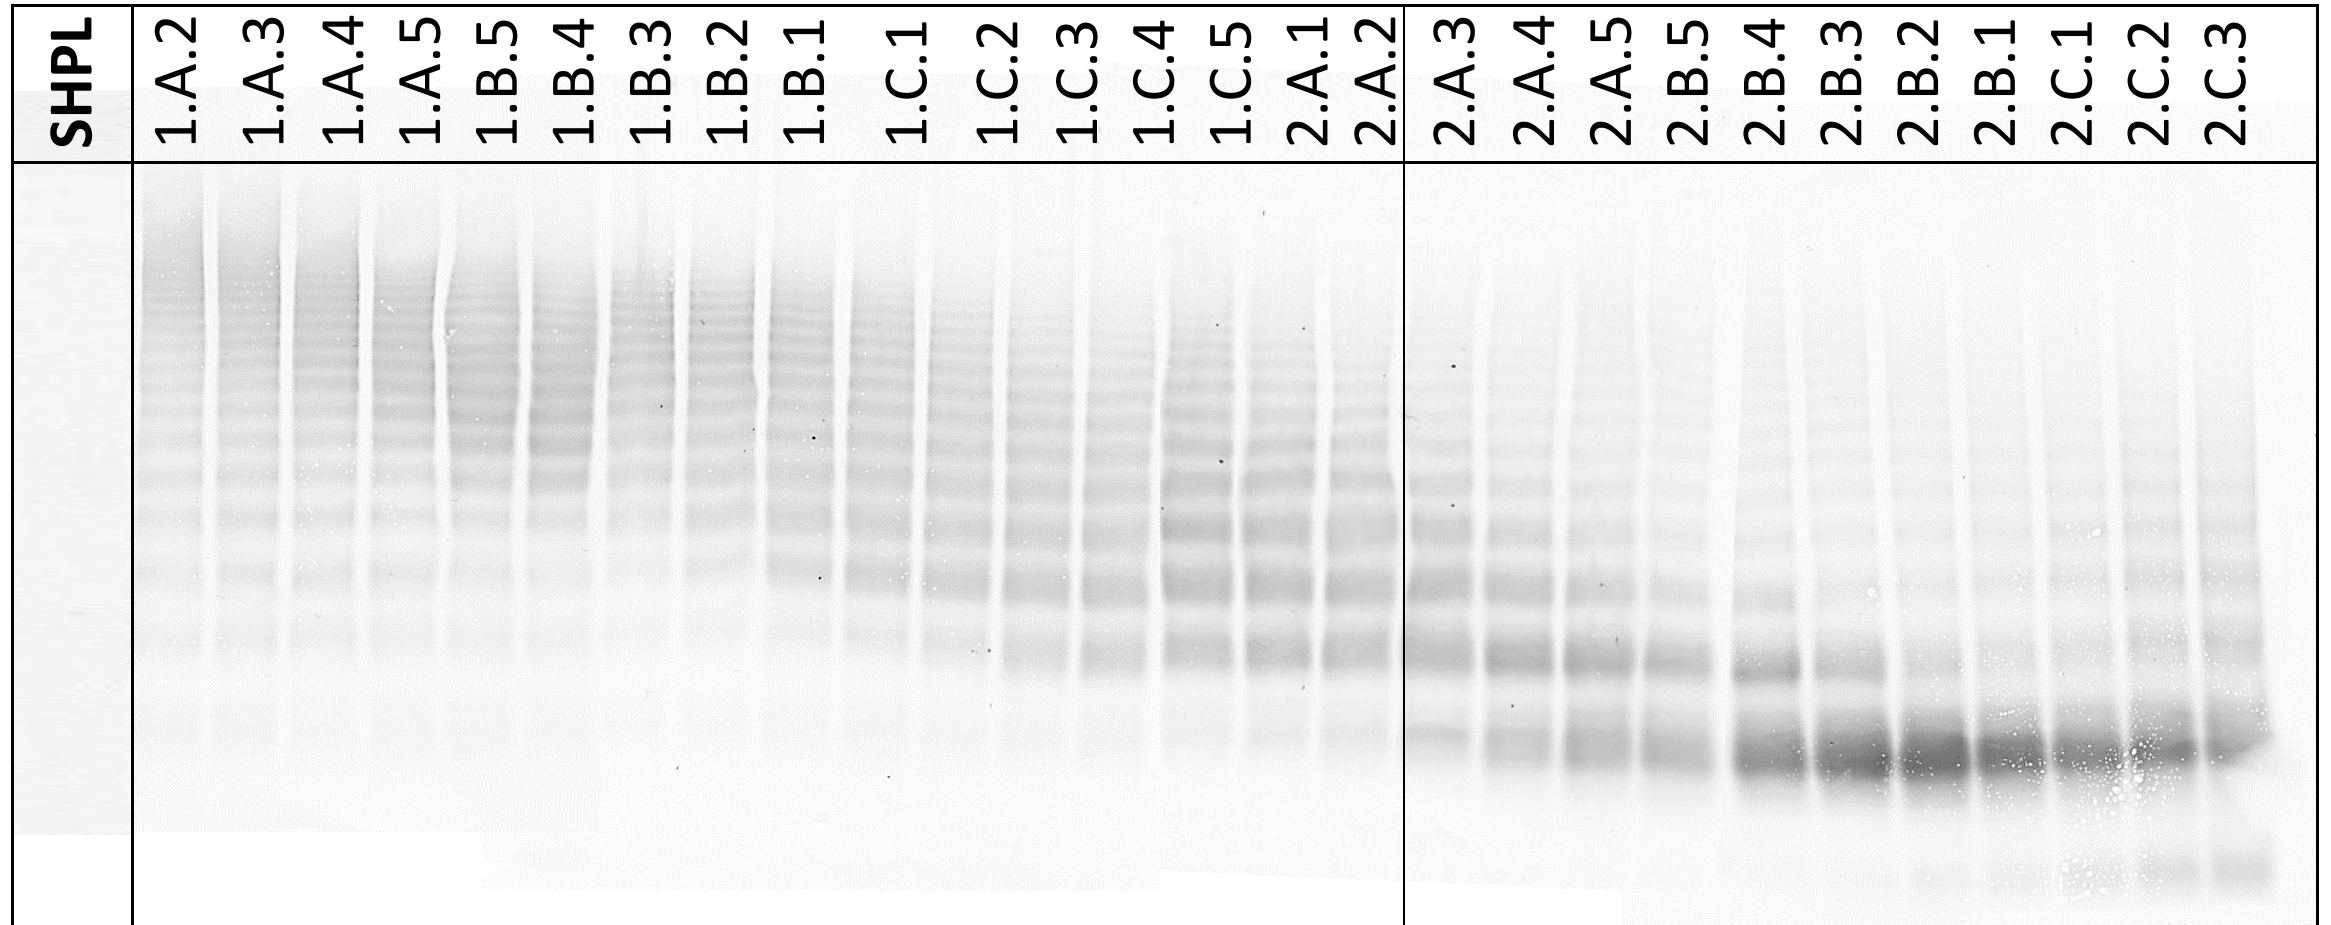

**Supplementary Figure 2.** Western blot of VWF multimers. Fractions 1.A.2 to 2.A.2 were collected and used as pdVWF. Standard human plasma and samples (fractions of size exclusion chromatography step) were loaded in a 1% agarose gel (Biorad), each 2 IU VWF:Ag (0.1 IU/mL). Sample and electrophoresis buffer: Tris-Glycine/SDS (Novex). Protein was transferred to a nitrocellulose membrane (Amershan), detected by rabbit anti-human-VWF (Dako) and stained with anti-rabbit-IgG conjugated with alkaline phosphatase (Sigma).

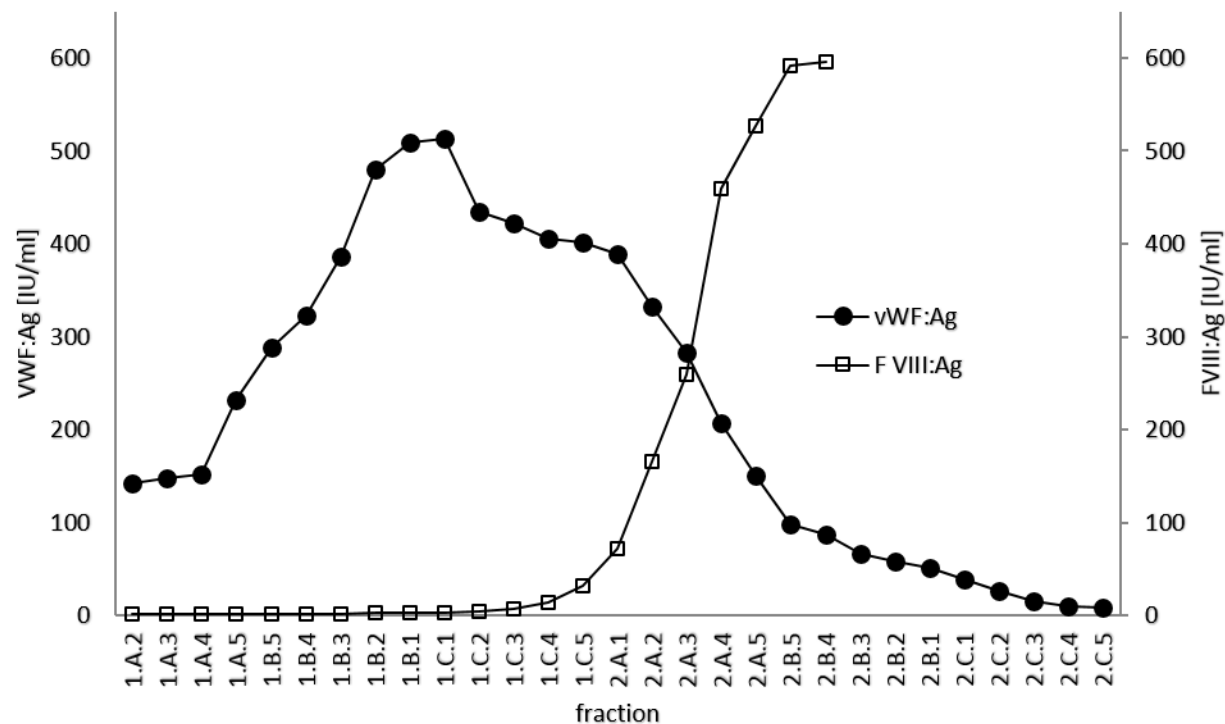

**Supplementary Figure 3:** Separation of PD-FVIII bound to PD-VWF through size exclusion chromatography step (HiPrep Sephacryl S500, GE Healthcare); HEPES buffer was added 400 nM calcium chloride. PdVWF fractions were collected, fractions containing FVIII and VWF were discarded. VWF:Ag and FVIII:Ag were detected by commercial ELISA Kits (vWF Ag<sup>®</sup> Testkit, SIEMENS Heathineers, Marburg (Germany); Anti-Human Factor VIII:C, Cedarlane, Hornby, Ontario (Canada)).

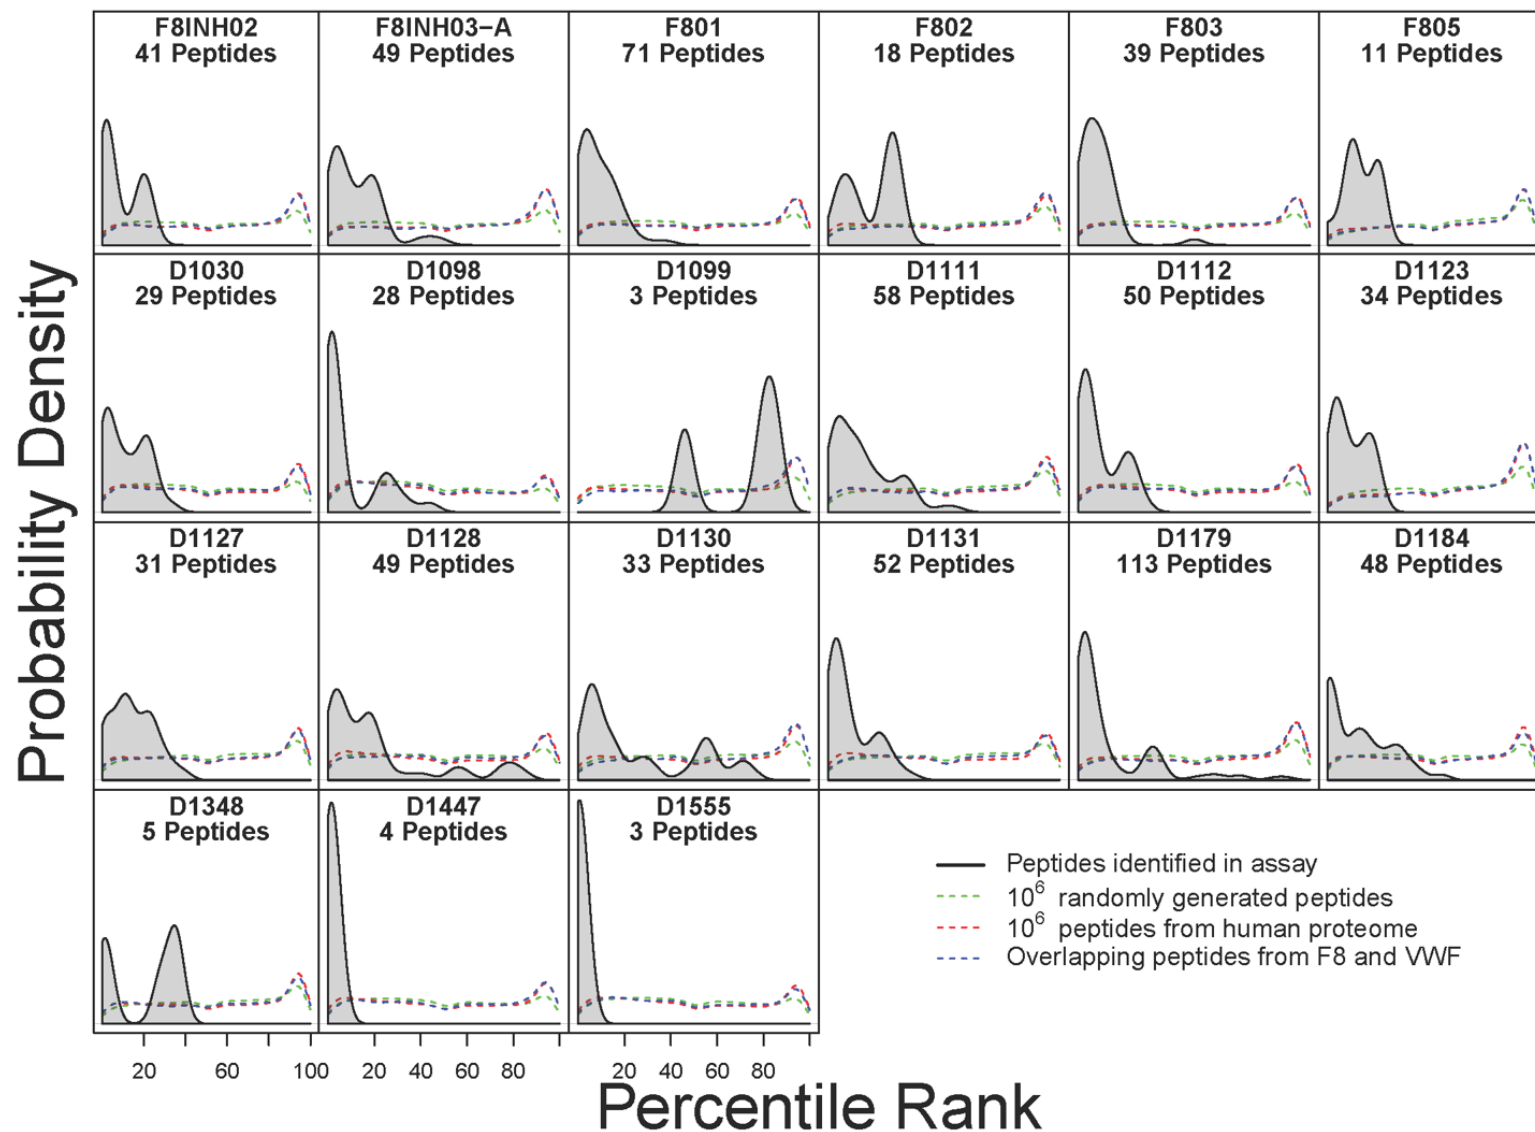

**Supplementary Figure 4.** Affinities of FVIII peptides identified on MoDCs. The distribution of percentile rank scores predicted by netMHCIIpan3.2 for all peptides found in the MAPPs assay for each donor (black/grey fill), compared to the distribution of percentile rank scores for  $1 \times 10^6$  random strings of 15 amino acids (green),  $1 \times 10^6$  random 15-mers from the human proteome (red), and all 15-mers from FVIII and VWF (blue).

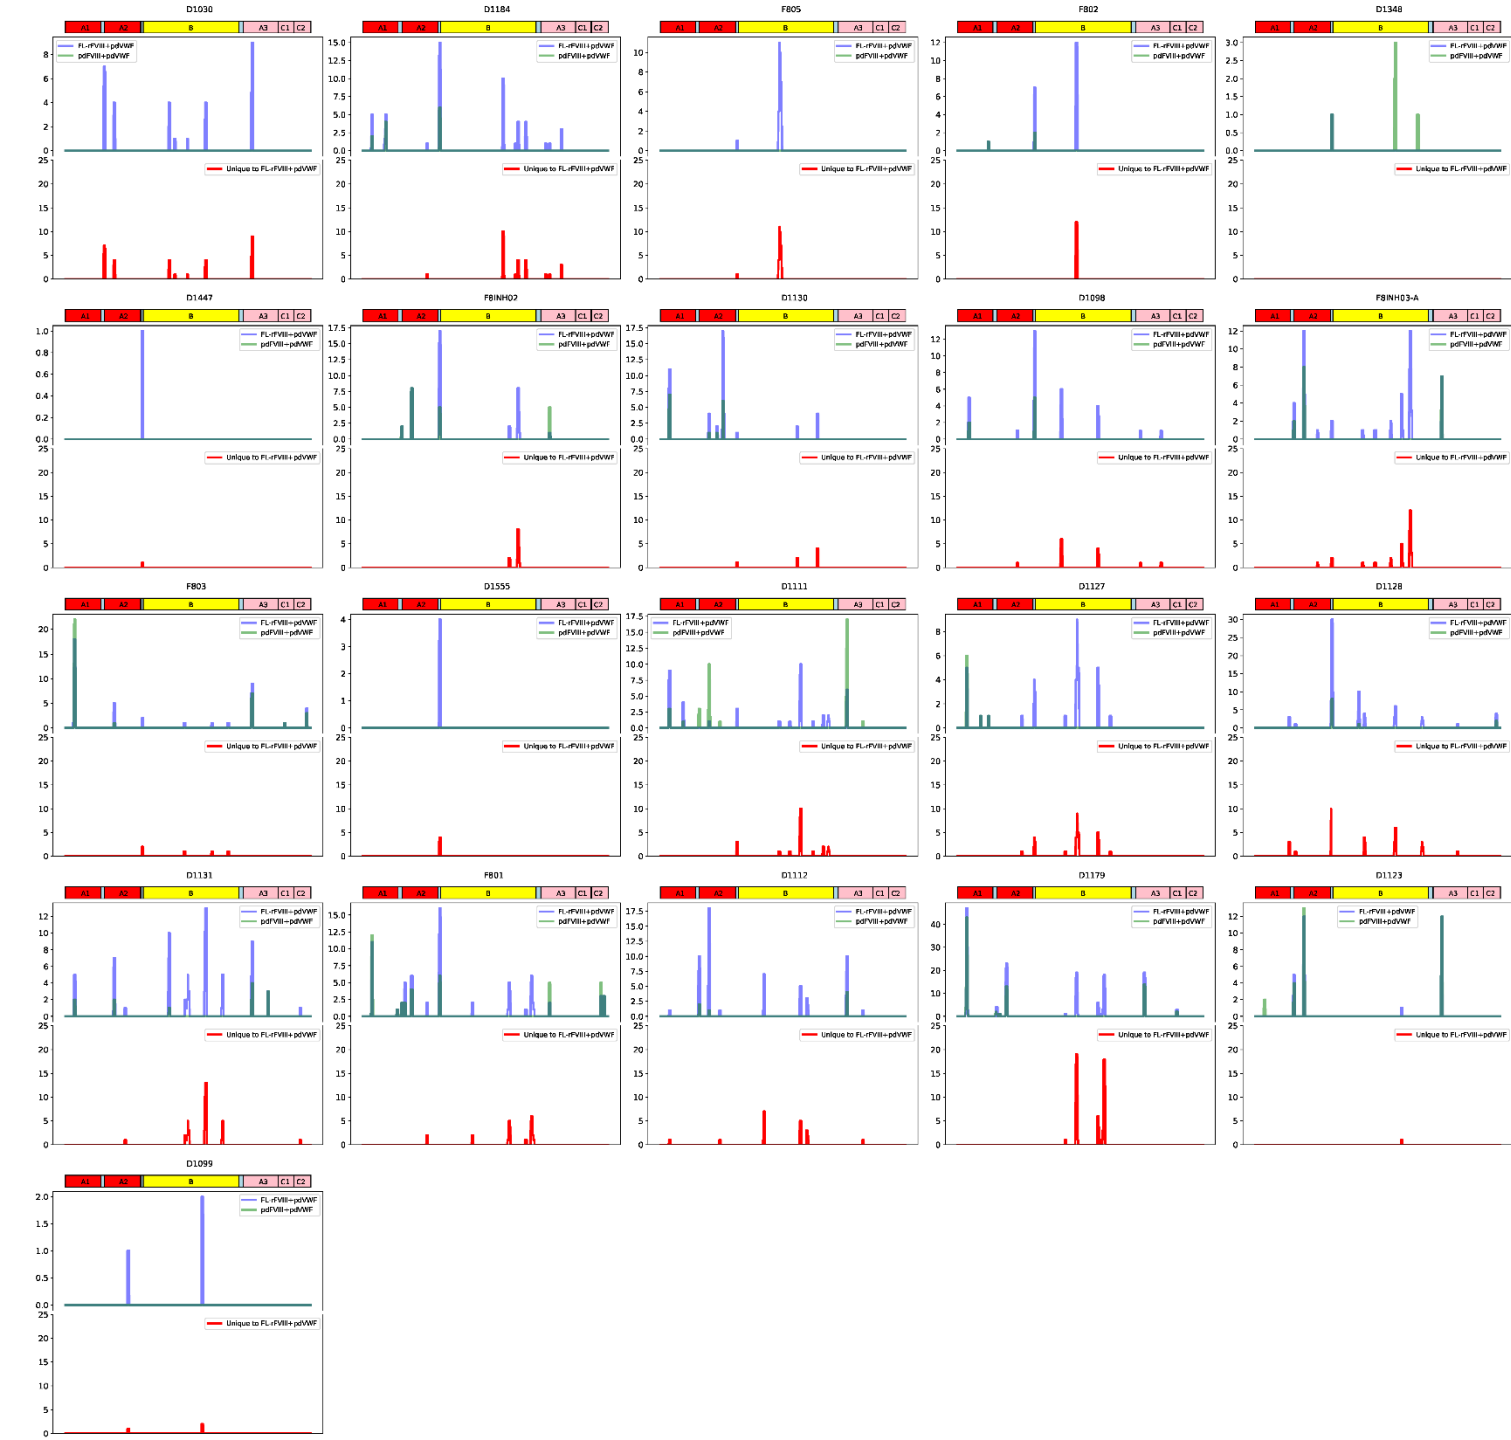

**Supplementary Figure 5.** Comparison of FVIII peptides identified in a MAPPs assay following incubation of MoDCs with FL-rFVIII + pdVWF or pdFVIII + pdVWF. Frequencies of peptides identified in the MAPPs assay for each donor following incubation of APCs with FL-rFVIII + pdVWF (blue) or pdFVIII + pdVWF (red). Lower panel (green) shows location and frequencies of peptides identified following incubation with FL- rFVIII + pdVWF where no peptides were found after incubation with pdFVIII+ pdVWF.

| Study ID  | Mutation                            | Severity | Inhibitor                       | Race  | Factor products used                                                                                                            |
|-----------|-------------------------------------|----------|---------------------------------|-------|---------------------------------------------------------------------------------------------------------------------------------|
| F8INH02   | Intron 22                           | severe   | Past                            | White | Novoseven, Hemofil M                                                                                                            |
| F8INH03-A | missense / c.6147G>T (p.Lys2049Asn) | severe   | Current                         | White | Alphanate, Novoseven, FEIBA, Hemofil M, Kogenate, Xyntha                                                                        |
| F801      | Intron 22                           | severe   | No history at time of procedure | White | Advate, Recombinate, Adynovate, Koate                                                                                           |
| F802      | Intron 22                           | severe   | No                              | White | Eloctate, Recombinate, Xyntha, Afstyla, Koate                                                                                   |
| F803      | missense / c.7033T>C (p.Cys2345Arg) | severe   | No                              | White | Hemofil M, Monarc-M, Koate                                                                                                      |
| F805      | Intron 22                           | severe   | No                              | White | Kogenate (new patient to UNC, don't have factor product history, but has been on Kogenate since around 2008 per patient report) |

**Supplementary Table 1:** HA patient information
